# Supplementary material for: An adult-based insulin resistance genetic risk score associates with insulin resistance, metabolic traits and altered fat distribution in Danish children and adolescents who are overweight or obese
Source: Springer Nature journal article supplement (doi:10.1007/s00125-018-4640-0), 2018-05-31
Supplement: MOESM1 [file 15808678]

## Electronic supplementary material

### Tables

**ESM Table 1.** Information on the 53 SNPs included in the GRS<sub>53</sub>

| Chromosome | Position  | SNP        | Locus name                 | Risk/Other allele | Risk allele frequency |
|------------|-----------|------------|----------------------------|-------------------|-----------------------|
| Chr 8      | 19830769  | rs1011685  | <i>LPL</i>                 | C/T               | 0.90                  |
| Chr 2      | 165513091 | rs10195252 | <i>COBLL1 / GRB14</i>      | T/C               | 0.57                  |
| Chr 5      | 118729286 | rs1045241  | <i>TNFAIP8</i>             | C/T               | 0.71                  |
| Chr 10     | 64868989  | rs10995441 | <i>NRBF2</i>               | G/T               | 0.21                  |
| Chr 3      | 52896605  | rs11130329 | <i>TMEM110-<br/>MUSTN1</i> | A/C               | 0.86                  |
| Chr 11     | 63862362  | rs11231693 | <i>MACROD1</i>             | A/G               | 0.07                  |
| Chr 1      | 110499925 | rs11577194 | <i>CSF1</i>                | T/C               | 0.47                  |
| Chr 6      | 35004569  | rs12525532 | <i>ANKS1A</i>              | T/C               | 0.40                  |
| Chr 22     | 38563471  | rs132985   | <i>PLA2G6</i>              | C/T               | 0.54                  |
| Chr 7      | 15883477  | rs17169104 | <i>MEOX2</i>               | G/C               | 0.30                  |
| Chr 1      | 50815533  | rs17386142 | <i>DMRTA2</i>              | C/T               | 0.92                  |
| Chr 12     | 14571421  | rs17402950 | <i>ATF7IP</i>              | G/A               | 0.06                  |
| Chr 8      | 9185146   | rs2126259  | <i>PPP1R3B</i>             | T/C               | 0.10                  |
| Chr 2      | 65287646  | rs2249105  | <i>CEP68</i>               | A/G               | 0.66                  |
| Chr 5      | 158021791 | rs2434612  | <i>EBF1</i>                | G/A               | 0.21                  |
| Chr 4      | 3479886   | rs2699429  | <i>DOK7</i>                | C/T               | 0.41                  |
| Chr 6      | 127452685 | rs2745353  | <i>RSPO3</i>               | T/C               | 0.54                  |
| Chr 2      | 227098930 | rs2943645  | <i>IRS1</i>                | T/C               | 0.63                  |
| Chr 3      | 47375705  | rs295449   | <i>KLHL18</i>              | A/G               | 0.60                  |
| Chr 3      | 12116370  | rs308971   | <i>SYN2 / PPARG</i>        | G/A               | 0.13                  |
| Chr 4      | 89741019  | rs3822072  | <i>FAM13A</i>              | A/G               | 0.43                  |
| Chr 6      | 139828666 | rs3861397  | <i>LINC01625</i>           | G/A               | 0.37                  |
| Chr 3      | 15185384  | rs3864041  | <i>COL6A4P1</i>            | T/C               | 0.59                  |
| Chr 5      | 55806501  | rs459193   | <i>ANKRD55</i>             | G/A               | 0.75                  |
| Chr 8      | 72469492  | rs4738141  | <i>EYA1</i>                | G/A               | 0.24                  |
| Chr 19     | 8615339   | rs4804311  | <i>MYO1F</i>               | A/G               | 0.94                  |

|        |           |           |                              |     |      |
|--------|-----------|-----------|------------------------------|-----|------|
| Chr 19 | 7970385   | rs4804833 | <i>MAP2K7</i>                | A/G | 0.40 |
| Chr 1  | 219721854 | rs4846565 | <i>RNU5F-1 /<br/>LYPLAL1</i> | G/A | 0.66 |
| Chr 5  | 53272414  | rs4865796 | <i>ARL15 / FST</i>           | A/G | 0.70 |
| Chr 2  | 219349502 | rs492400  | <i>USP37</i>                 | T/C | 0.57 |
| Chr 5  | 67713996  | rs4976033 | <i>PIK3R1</i>                | G/A | 0.42 |
| Chr 9  | 78033919  | rs498313  | <i>MIR548H3</i>              | A/G | 0.69 |
| Chr 20 | 45602388  | rs6066149 | <i>EYA2</i>                  | G/A | 0.74 |
| Chr 3  | 135926372 | rs645040  | <i>MSL2</i>                  | T/G | 0.79 |
| Chr 4  | 157734425 | rs6822892 | <i>PDGFC</i>                 | A/G | 0.67 |
| Chr 1  | 39895210  | rs683135  | <i>MACF1</i>                 | A/G | 0.31 |
| Chr 5  | 112711236 | rs6887914 | <i>MCC</i>                   | C/T | 0.79 |
| Chr 6  | 43815114  | rs6937438 | <i>LINC02537</i>             | A/G | 0.74 |
| Chr 8  | 126528705 | rs7005992 | <i>TRIB1</i>                 | C/G | 0.16 |
| Chr 15 | 39463917  | rs7176058 | <i>C15orf54</i>              | A/G | 0.84 |
| Chr 12 | 26453033  | rs718314  | <i>ITPR2</i>                 | G/A | 0.26 |
| Chr 18 | 47174429  | rs7227237 | <i>LIPG</i>                  | C/T | 0.78 |
| Chr 19 | 33898815  | rs731839  | <i>PEPD</i>                  | G/A | 0.34 |
| Chr 13 | 111627945 | rs7323406 | <i>ANKRD10</i>               | A/G | 0.30 |
| Chr 17 | 4656784   | rs754814  | <i>ZMYND15</i>               | T/C | 0.69 |
| Chr 12 | 124448973 | rs7973683 | <i>CCDC92 /<br/>DNAH10</i>   | C/A | 0.67 |
| Chr 15 | 73080817  | rs8032586 | <i>ADPGK-AS1</i>             | C/T | 0.92 |
| Chr 19 | 7292869   | rs8101064 | <i>INSR</i>                  | T/C | 0.03 |
| Chr 1  | 172312519 | rs9425291 | <i>DNM3</i>                  | A/G | 0.44 |
| Chr 6  | 130398481 | rs9492443 | <i>L3MBTL3</i>               | C/T | 0.75 |
| Chr 5  | 173350155 | rs966544  | <i>CPEB4</i>                 | G/A | 0.32 |
| Chr 7  | 130466604 | rs972283  | <i>KLF14</i>                 | G/A | 0.51 |
| Chr 3  | 123082166 | rs9881942 | <i>ADCY5</i>                 | A/G | 0.46 |

SNP rs numbers are provided as reported by Lotta et al [1] along with locus name. SNP positions are based on build GRCh37/hg19. In addition, the risk allele frequencies, as calculated from the TCOCT and control population of children used in the present study, are provided ( $n = 1618$ ).

**ESM Table 2.** Association between GRS<sub>53</sub> and insulin resistance and other metabolic traits in Inter99 (non-diabetic individuals).

|                                  | uGRS <sub>53</sub> |                |                              | wGRS <sub>53</sub> |                |                             |
|----------------------------------|--------------------|----------------|------------------------------|--------------------|----------------|-----------------------------|
|                                  | <i>n</i>           | $\beta \pm SE$ | <i>p</i> value               | <i>n</i>           | $\beta \pm SE$ | <i>p</i> value              |
| <b>Biochemical measures</b>      |                    |                |                              |                    |                |                             |
| HOMA-IR                          | 5061               | 0.014 ± 0.003  | 1.45 x 10 <sup>-7a***</sup>  | 5061               | 0.011 ± 0.003  | 2.65 x 10 <sup>-6a***</sup> |
| Fasting serum insulin            | 5063               | 0.014 ± 0.003  | 2.25 x 10 <sup>-7a***</sup>  | 5063               | 0.012 ± 0.003  | 2.62 x 10 <sup>-6a***</sup> |
| Fasting plasma glucose           | 5249               | 0.006 ± 0.003  | 0.04 <sup>a*</sup>           | 5249               | 0.004 ± 0.003  | 0.08 <sup>a</sup>           |
| HbA <sub>1c</sub>                | 5247               | 0.006 ± 0.003  | 0.06 <sup>a</sup>            | 5247               | 0.003 ± 0.003  | 0.32 <sup>a</sup>           |
| Fasting plasma HDL-cholesterol   | 5247               | -0.018 ± 0.003 | 4.86 x 10 <sup>-10b***</sup> | 5247               | -0.014 ± 0.003 | 3.81 x 10 <sup>-7b***</sup> |
| Fasting plasma total cholesterol | 5244               | 0.007 ± 0.003  | 1.60 x 10 <sup>-2a*</sup>    | 5244               | 0.008 ± 0.003  | 5.88 x 10 <sup>-3a**</sup>  |
| Fasting plasma triacylglycerol   | 5251               | 0.022 ± 0.003  | 1.14 x 10 <sup>-12b***</sup> | 5251               | 0.018 ± 0.003  | 6.04 x 10 <sup>-7b***</sup> |
| <b>Anthropometrics</b>           |                    |                |                              |                    |                |                             |
| BMI                              | 5253               | -0.002 ± 0.003 | 0.54 <sup>b</sup>            | 5253               | -0.002 ± 0.003 | 0.48 <sup>b</sup>           |
| Waist-hip ratio                  | 5250               | 0.010 ± 0.002  | 8.25 x 10 <sup>-7a***</sup>  | 5250               | 0.009 ± 0.002  | 1.20 x 10 <sup>-6a***</sup> |
| <b>Blood pressure</b>            |                    |                |                              |                    |                |                             |
| Systolic BP                      | 5252               | 0.004 ± 0.003  | 0.19 <sup>a</sup>            | 5252               | 0.003 ± 0.003  | 0.32 <sup>a</sup>           |
| Diastolic BP                     | 5251               | 0.006 ± 0.003  | 2.50 x 10 <sup>-2a*</sup>    | 5251               | 0.007 ± 0.003  | 7.80 x 10 <sup>-3a**</sup>  |

Results are shown for the unweighted (uGRS) and weighted GRS (wGRS). Effect sizes, standard errors and *p* values were calculated using inverse normal transformation (SD/per allele).

<sup>a</sup>Analyses were adjusted for age, sex and BMI.

<sup>b</sup>Analyses were adjusted for age and sex.

\**p* < 0.05, \*\**p* < 0.01 and \*\*\**p* < 0.001.

**ESM Table 3.** Directionality of SNP-specific effects on selected traits.

| Trait                          | Inter99                           |                            | TDCOB                             |                           |                                   |                |
|--------------------------------|-----------------------------------|----------------------------|-----------------------------------|---------------------------|-----------------------------------|----------------|
|                                |                                   |                            | TCOCT sample                      |                           | Population-based control sample   |                |
|                                | Ratio of same-directional effects | <i>p</i> value             | Ratio of same-directional effects | <i>p</i> value            | Ratio of same-directional effects | <i>p</i> value |
| HOMA-IR                        | 42/53                             | 2.25 x 10 <sup>-5***</sup> | 31/53                             | 0.27                      | 31/53                             | 0.27           |
| Fasting serum insulin          | 41/53                             | 8.17 x 10 <sup>-5***</sup> | 31/53                             | 0.27                      | 31/53                             | 0.27           |
| Fasting plasma HDL-cholesterol | 42/53                             | 2.25 x 10 <sup>-5***</sup> | 38/53                             | 2.19 x 10 <sup>-3**</sup> | 33/53                             | 0.10           |
| Fasting plasma triacylglycerol | 45/53                             | 2.37 x 10 <sup>-7***</sup> | 26/53                             | 1.00                      | 25/53                             | 0.78           |

Direction of effects was classified based on the direction of effect reported in Lotta et al [1].

\**p* < 0.05, \*\**p* < 0.01 and \*\*\**p* < 0.001.

## Figures

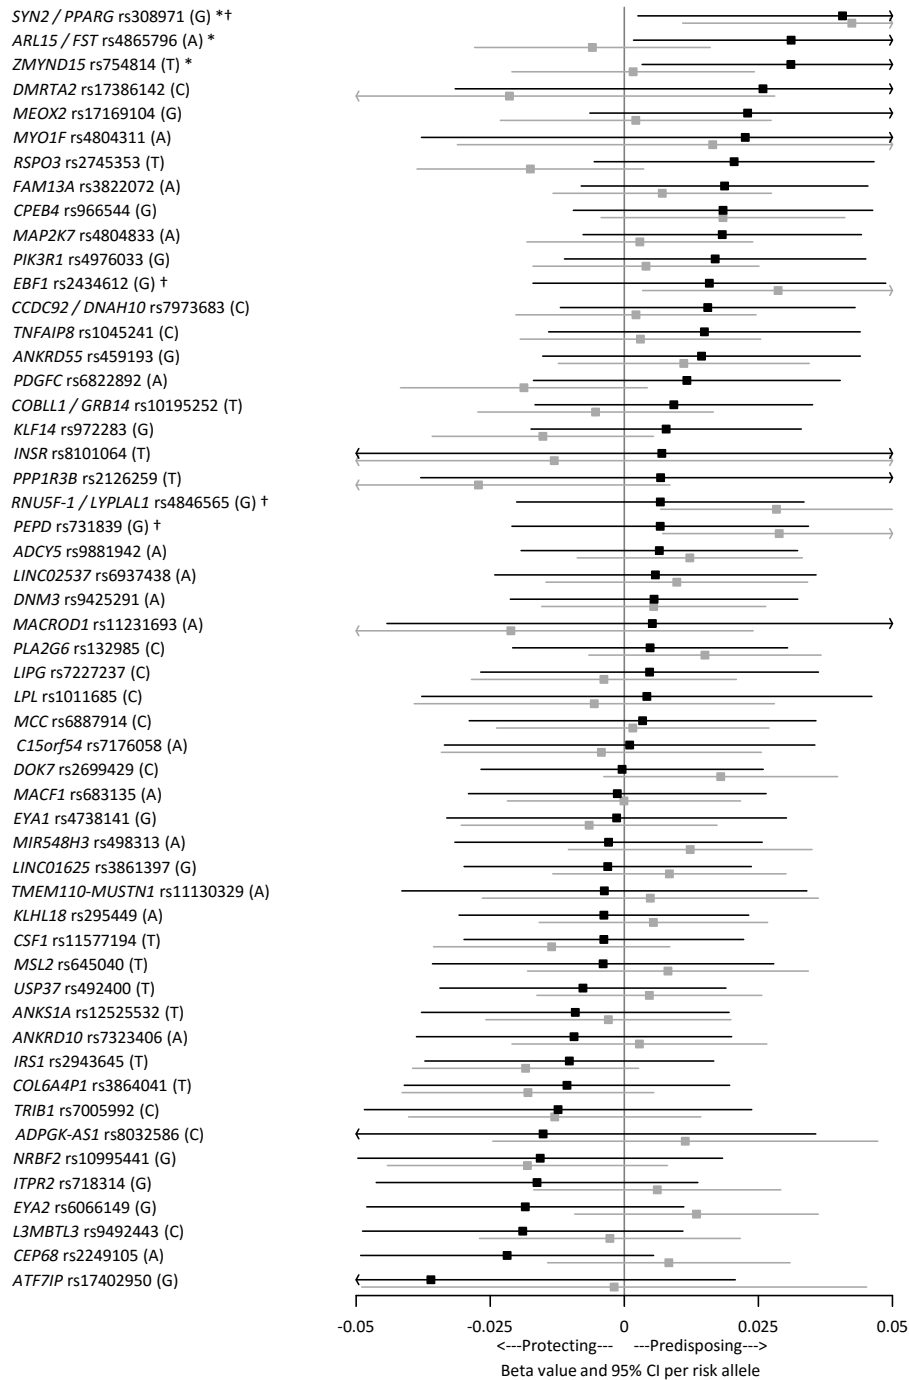

**ESM Fig. 1.** SNP-specific associations with fasting serum insulin concentrations in children from the TCOCT sample (black lines) and population-based control sample (grey lines). For each SNP, name of nearest gene, rs number, and risk allele as reported [1] are provided. \* $p < 0.05$  for the association between the given SNP and fasting serum insulin in the TCOCT sample. † $p < 0.05$  for the association between the given SNP and fasting serum insulin in the population-based sample.

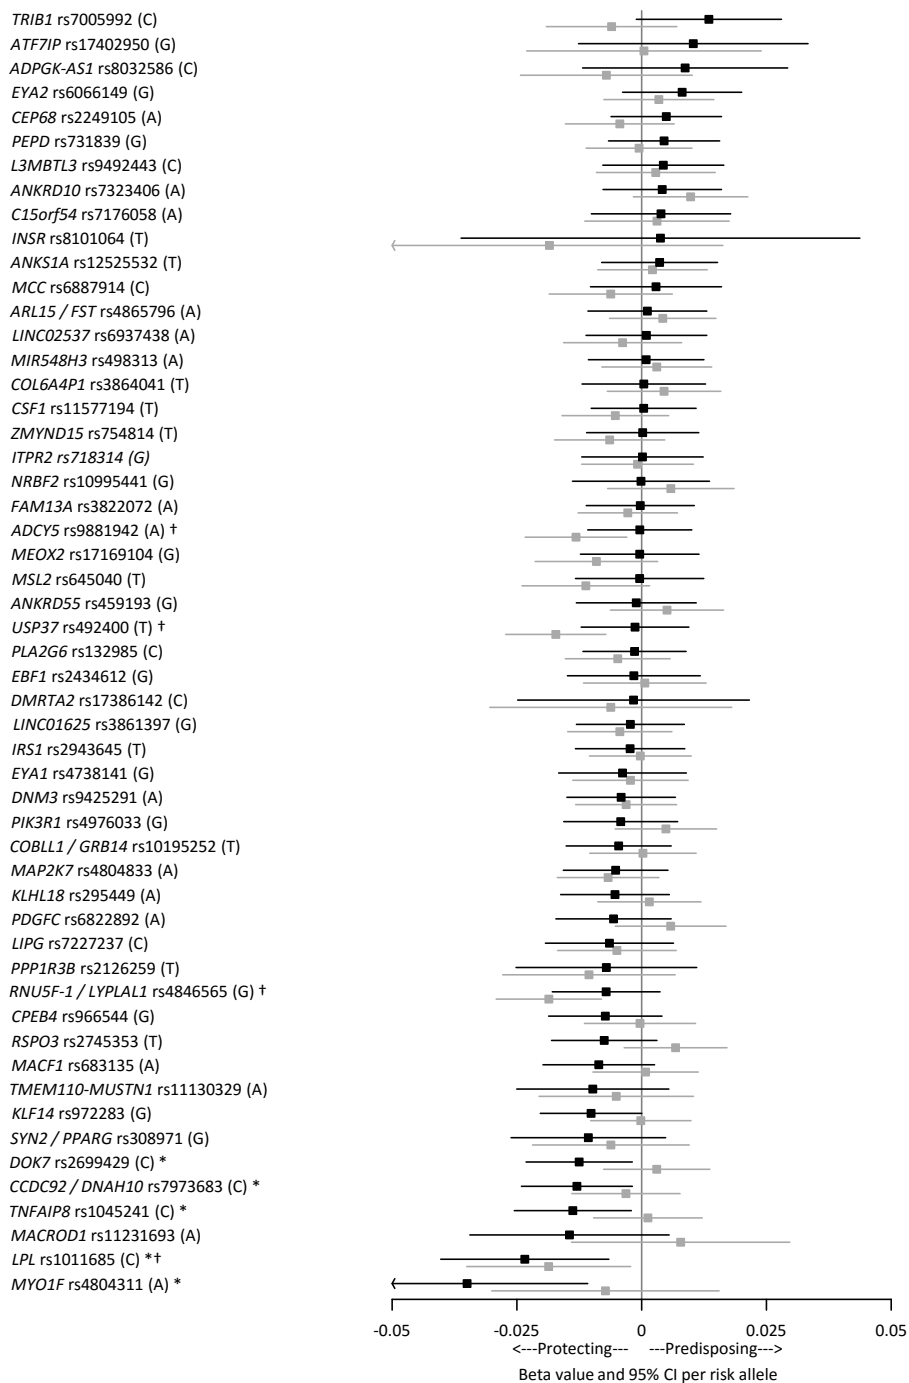

**ESM Fig. 2.** SNP-specific associations with plasma HDL-cholesterol concentrations in children from the TCOCT sample (black lines) and population-based control sample (grey lines). For each SNP, name of nearest gene, rs number, and risk allele as reported [1] are provided. \* $p < 0.05$  for the association between the given SNP and plasma HDL-cholesterol in the TCOCT sample. † $p < 0.05$  for the association between the given SNP and plasma HDL-cholesterol in the population-based sample.

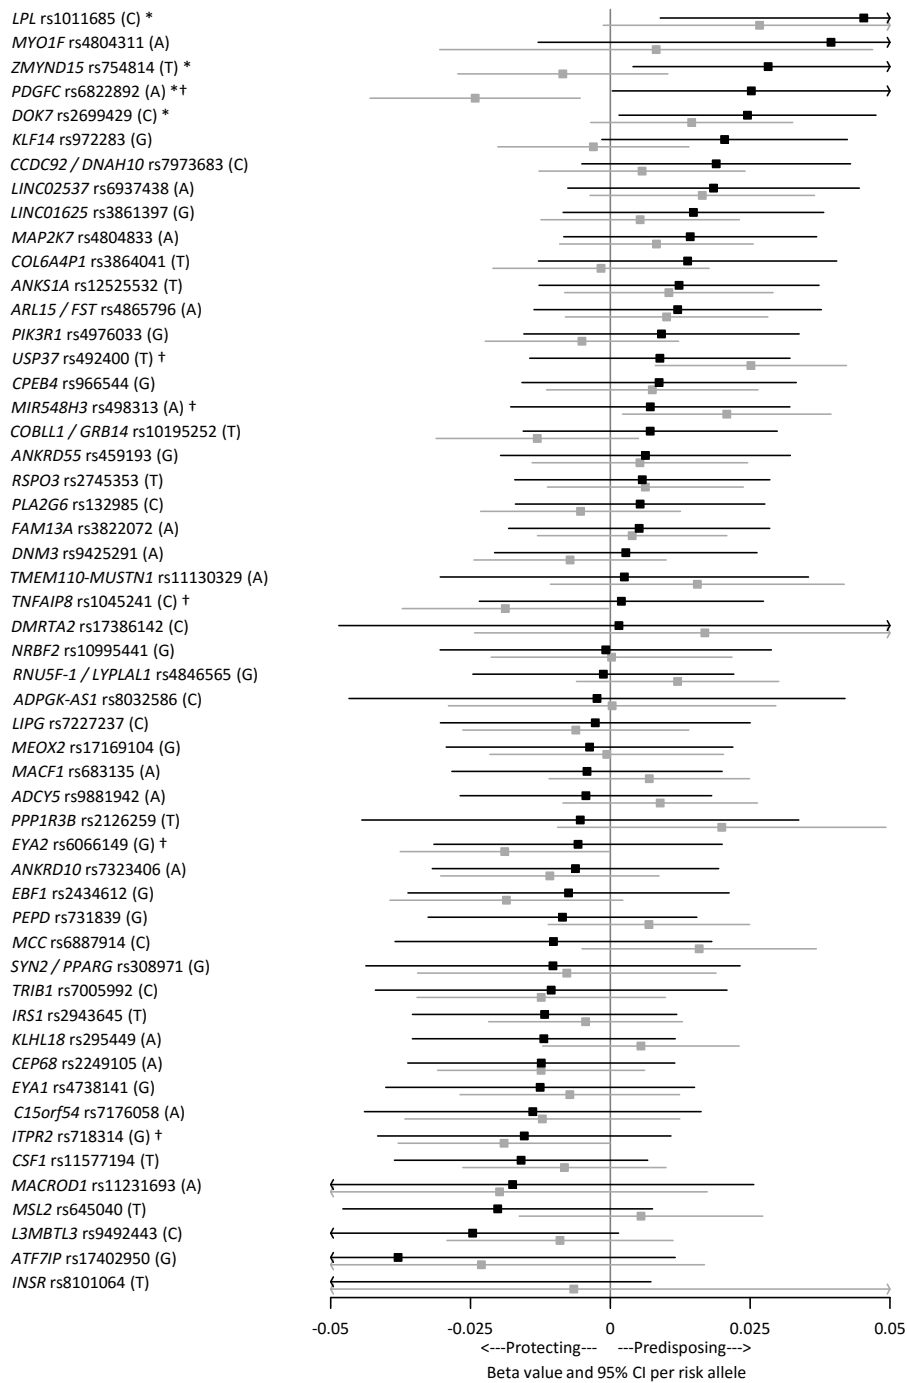

**ESM Fig. 3.** SNP-specific associations with plasma triacylglycerol concentrations in children from the TCOCT sample (black lines) and population-based control sample (grey lines). For each SNP, name of nearest gene, rs number, and risk allele as reported [1] are provided. \* $p < 0.05$  for the association between the given SNP and plasma triacylglycerol in the TCOCT sample. † $p < 0.05$  for the association between the given SNP and plasma triacylglycerol in the population-based sample.

## References

1. Lotta LA, Gulati P, Day FR, et al (2017) Integrative genomic analysis implicates limited peripheral adipose storage capacity in the pathogenesis of human insulin resistance. *Nat Genet* 49:17–26.
